# Supplementary material for: The MYST Family Histone Acetyltransferase Sas3 Governs Diverse Biological Processes in <em>Aspergillus fumigatus</em>
Source: Preprints.org preprint supplement (doi:10.20944/preprints202311.0353.v1), 2023-11-08
Supplement: Supplementary file 1 [file supplementary]

October, 19, 2023

*Cells*

Dear Editor:

Enclosed please find our original research article entitled **“The MYST family histone acetyltransferase Sas3 governs diverse biological processes in *Aspergillus fumigatus*”** for publication in the **“Cells”** in the section of **“Plant, Algae and Fungi Cell Biology”**.

The conserved MYST proteins form the largest family of histone acetyltransferases (HATs) that acetylate lysines within the N-terminal tails of histone, enabling active gene transcription. Here, we have investigated the biological and regulatory functions of the MYST family HAT Sas3 in the opportunistic human pathogenic fungus *Aspergillus fumigatus* using a series of genetic, biochemical, pathogenic, and transcriptomic analyses and have demonstrated that Sas3 regulates diverse biological processes and virulence in this clinically important human pathogenic fungus *A. fumigatus*. We believe that this paper will be of interest to the broad readership of *Cells*.

Please consider the following scientists as potential referees of our manuscript: Drs. Jesus Aguirre Linares jaguirre@email.ifc.unam.mx, Gustavo Goldman ggoldman@usp.br, Gerhard Braus gbraus@gwdg.de, Kap-Hoon Han khhan@woosuk.ac.kr and Hee-Soo Park phsoo97@knu.ac.kr.

This manuscript has not been published or presented elsewhere in part or in entirety and is not under consideration by another journal. The study design was approved by the appropriate ethics review board. We have read and understood your journal's policies, and we believe that neither the manuscript nor the study violates any of these. There are no conflicts of interest to declare.

Thank you for your consideration. We look forward to hearing from you.

Sincerely Yours,

A handwritten signature in blue ink, appearing to read 'Kwang-Soo Shin'.

Kwang-Soo Shin, Ph.D.  
Professor of Microbiology, Daejeon University  
EBM of *Pathogens*
